# Supplementary material for: Direct glucose detection in whole blood by colorimetric assay based on glucose oxidase-conjugated graphene oxide/MnO2 nanozymes
Source: Royal Society of Chemistry journal article supplement (doi:10.1039/c8an02440e), 2019-01-01
Supplement: c8an02440e1.pdf [file c8an02440e1.pdf]

## Supporting Information

### Direct glucose detection in whole blood by colorimetric assay based on glucose oxidase-conjugated graphene oxide/MnO<sub>2</sub> nanozymes

Po-Chun Lee, Nan-Si Li, Ying-Pei Hsu, Chen Peng, and Hung-Wei Yang\*

#### Corresponding Author

\*E-mail address: [howardyang@mail.nsysu.edu.tw](mailto:howardyang@mail.nsysu.edu.tw) (H.W. Yang)

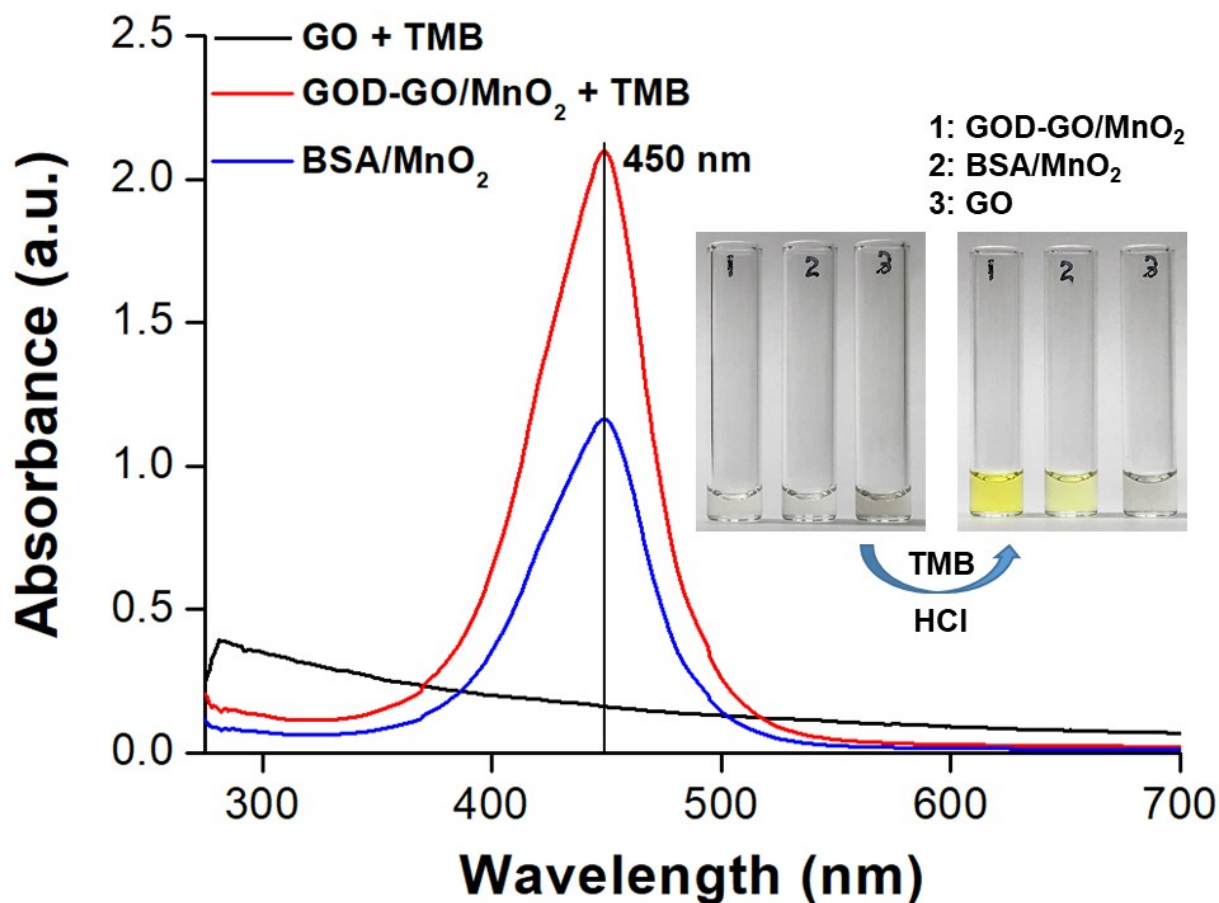

**Fig. S1.** Absorbance at 450 nm of GO and GOD-GO/MnO<sub>2</sub> reacted with TMB/H<sub>2</sub>O<sub>2</sub> for 1 min at room temperature after HCl was added to stop the reaction; the inset shows the corresponding image.

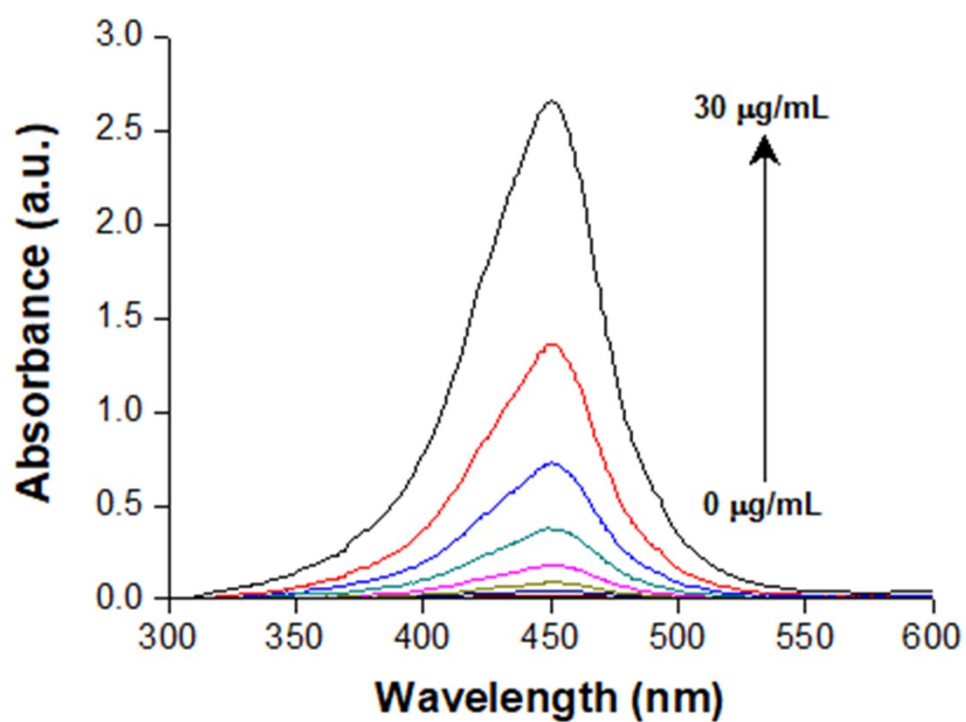

**Fig. S2.** UV–vis absorption spectra of the oxidized TMB in the presence of GOD-GO/MnO<sub>2</sub> for 1 min after HCl was added to stop the reaction; the arrow indicates the signal changes with the increasing concentrations of GOD-GO/MnO<sub>2</sub> (from 0 to 30 μg/mL).

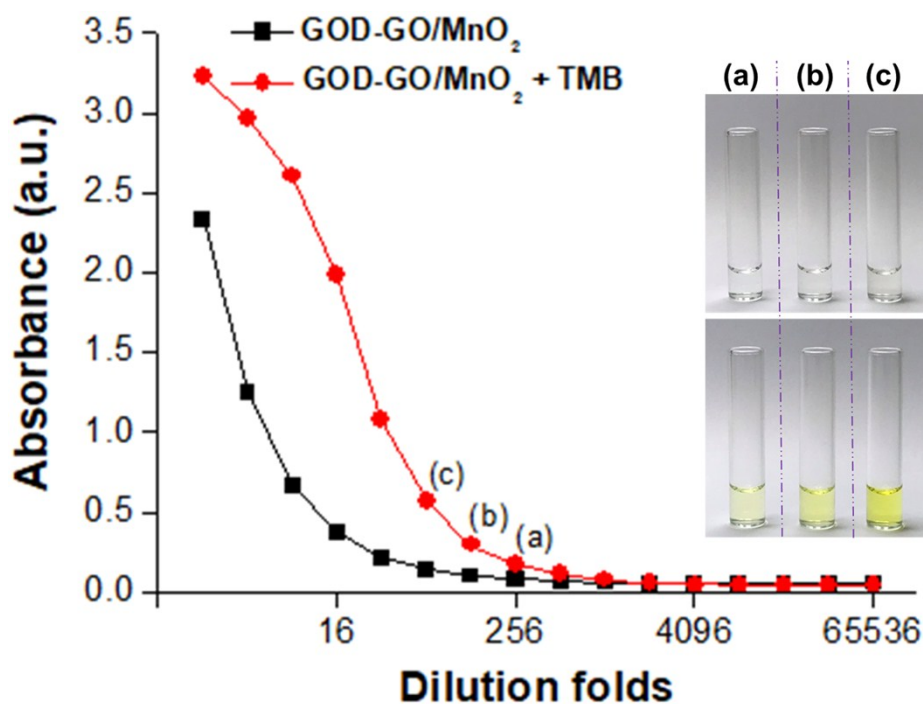

**Fig. S3.** Catalytic abilities of GOD-GO/MnO<sub>2</sub> during various dilution folds were determined by  $A_{370\text{nm}}$  for GOD-GO/MnO<sub>2</sub> and  $A_{450\text{nm}}$  for GOD-GO/MnO<sub>2</sub> + TMB/H<sub>2</sub>O<sub>2</sub>. Inset image (a): GOD-GO/MnO<sub>2</sub> suspension with a 64-fold dilution in the absence (*top*) and presence (*bottom*) of TMB, (B): GOD-GO/MnO<sub>2</sub> suspension with a 128-fold dilution in the absence (*top*) and presence (*bottom*) of TMB, and (C): GOD-GO/MnO<sub>2</sub> suspension with a 256-fold dilution in the absence (*top*) and presence (*bottom*) of TMB.

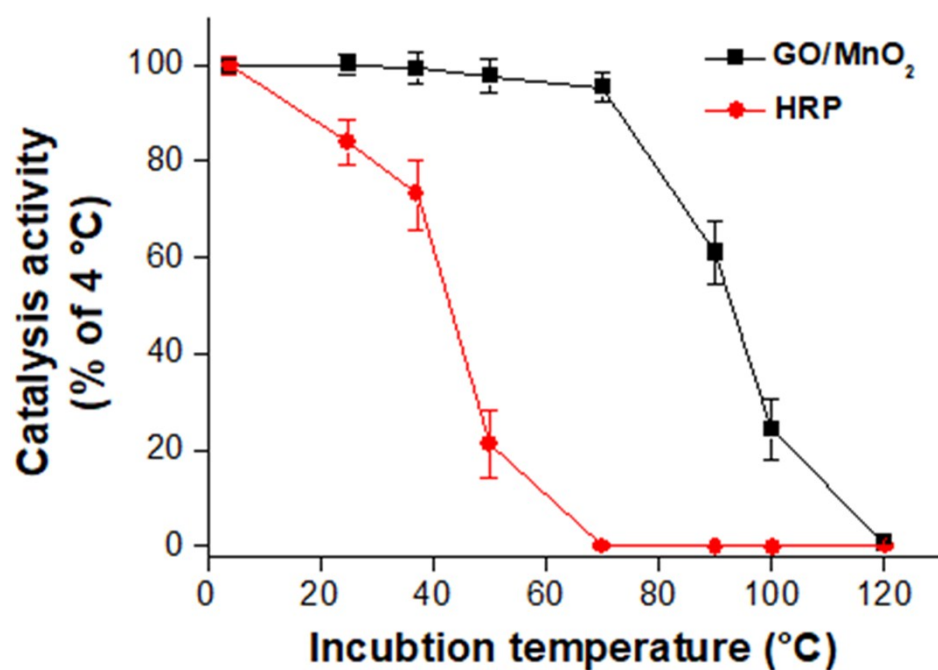

**Fig. S4.** Storage stability of GO/MnO<sub>2</sub> and HRP stored at different temperatures (from 4°C to 120°C) for 24 h; the activities of the stored HRP and GO/MnO<sub>2</sub> were determined by comparing their  $A_{450\text{nm}}$  values with their initial  $A_{450\text{nm}}$  values at day 0; values are means  $\pm$  SD (n = 6).

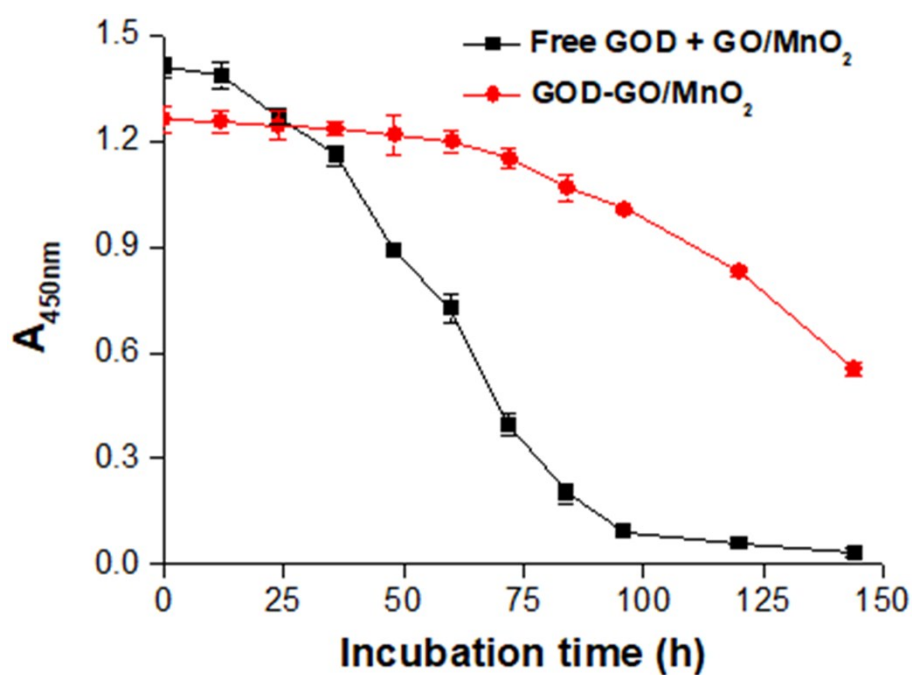

**Fig. S5.** Storage stability of free GOD (free GOD + GO/MnO<sub>2</sub>) and immobilized GOD (GOD-GO/MnO<sub>2</sub>) stored at 40°C for a period of 0–144 h; the activities of the stored free GOD and immobilized GOD were determined by comparing their A<sub>450nm</sub> values at each time point; values are means ± SD (n = 6).
